# Supplementary material
Source: PubMed Central journal article supplement (PMC551514)
Supplement: mbc_E04-08-0697_1.pdf [file mbc_E04-08-0697_1.pdf]

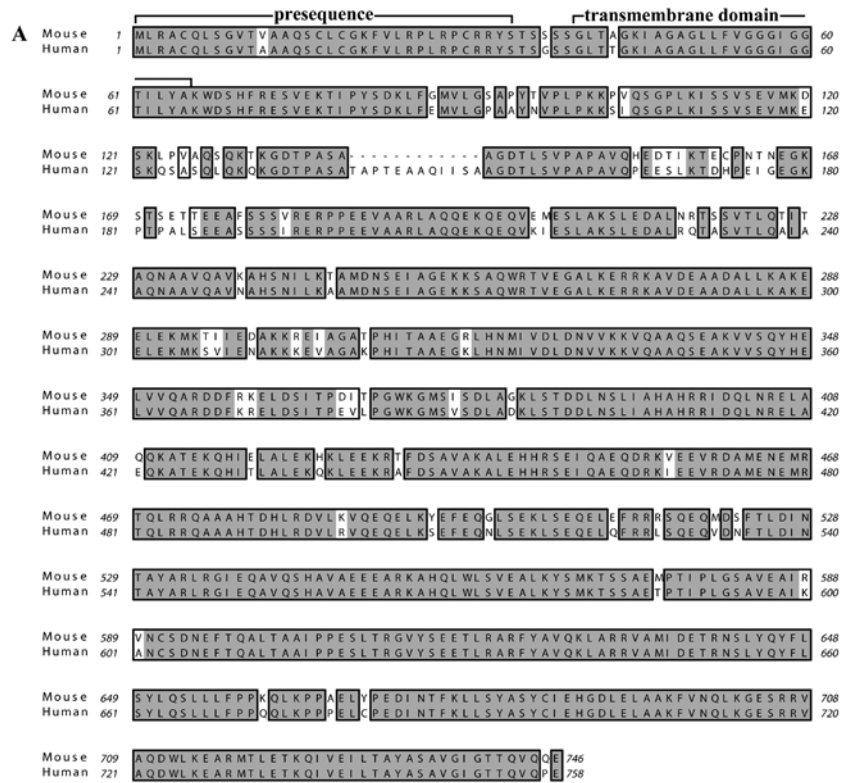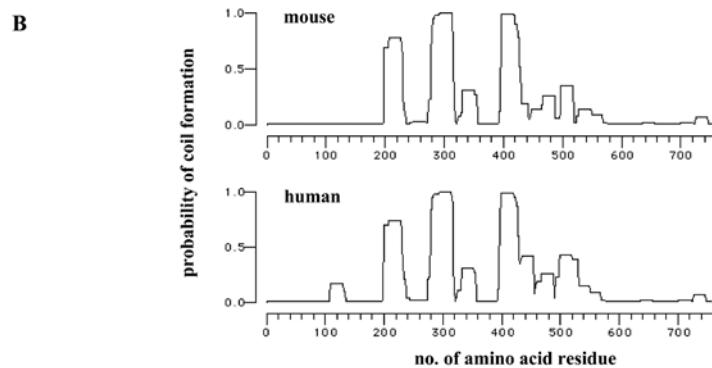

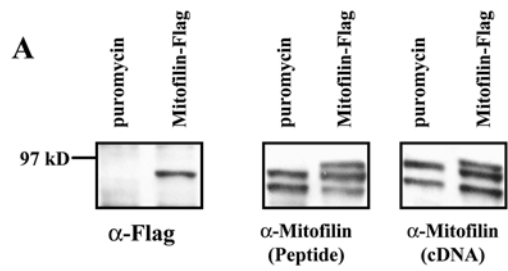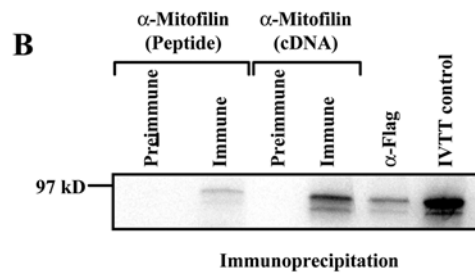

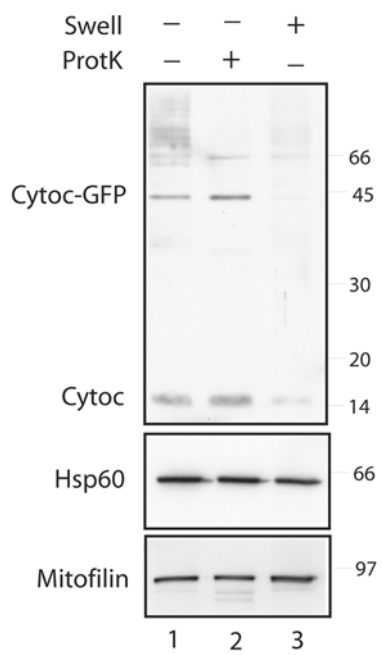

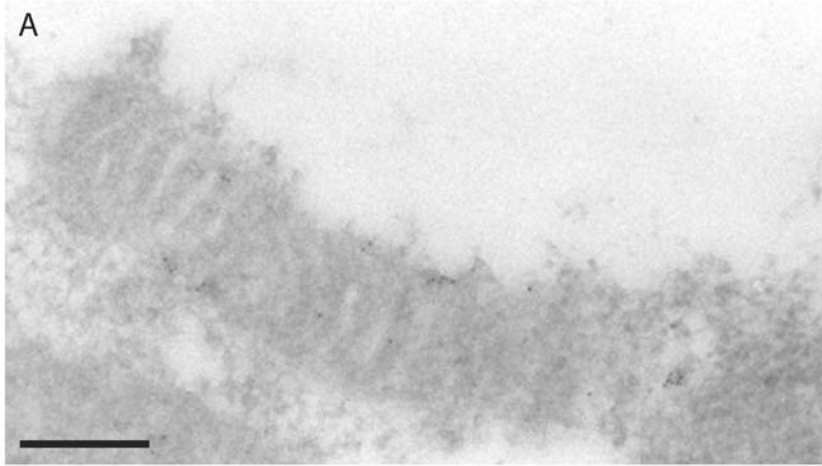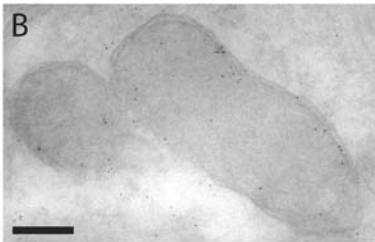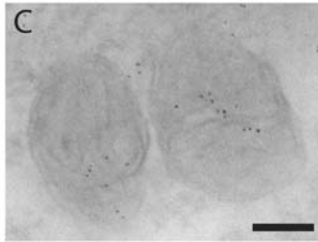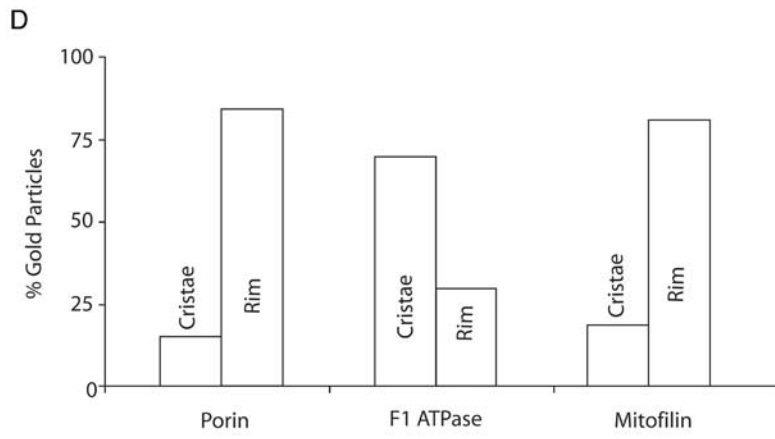

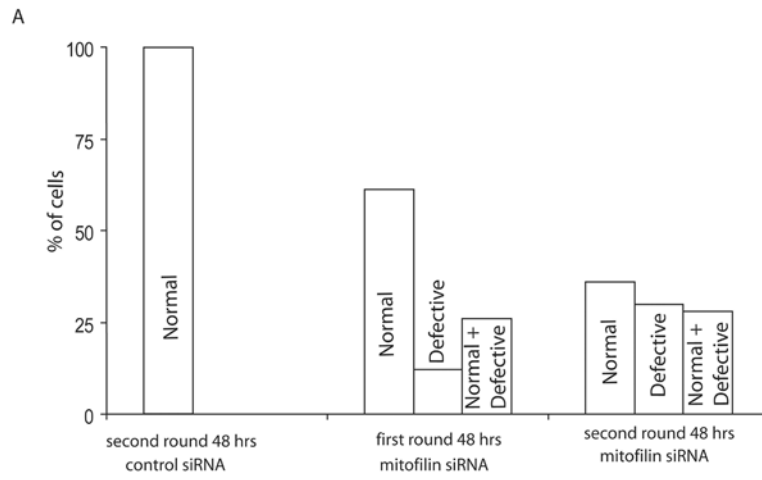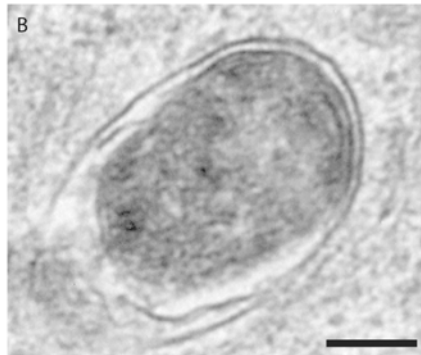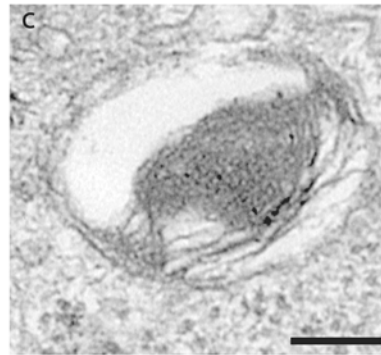

## **Online Supplemental Material**

### **Results**

#### **Generation and characterization of anti-mitofilin antibodies**

To study the role of *mitofilin* in mouse, we cloned a murine *mitofilin* cDNA by PCR from an embryonic day 17 cDNA library (Clontech) using primer sequences derived from mouse EST database. The relevant nucleotide sequence has been deposited at GenBank (Accession No. AK049189). Mouse mitofilin encodes a 747-amino acid protein with a predicted molecular weight of 89 kD, and shows 88% sequence identity and 92% sequence similarity to human mitofilin (Figure S1). We then generated two polyclonal antibodies (Abs) against mouse mitofilin, one of which was raised against amino acid residues 123-135 and 162-174 of mouse mitofilin, the other against the full-length protein. Western blot analysis using either Ab revealed Flag-tagged and endogenous mitofilin in mitofilin-Flag transfected C2C12 cells (Figure S2A). Endogenous mouse mitofilin, like human mitofilin, existed as a doublet of slightly different sizes. The pre-immune sera for both Abs failed to stain mitofilin (Unpublished data). Both Abs, but not the pre-immune sera, precipitated in vitro translated and radiolabeled mitofilin (Figure S2B).

#### **Subcellular fractionation of HeLa cells expressing cytochrome c-GFP**

To exclude the possibility that the GFP fusion protein may affect the submitochondrial localization of cytochrome c, mitochondria were isolated from HeLa cells expressing cytochrome c-GFP and subjected to swelling or proteinase K treatment (Figure S3). Treatment of mitochondria with proteinase K without swelling did not affect cytochrome c-GFP, whereas swelling resulted in loss of the protein as in the case of the endogenous cytochrome c, indicating its localization to the intermembrane space. Hsp60, a soluble matrix protein, and mitofilin were not affected by the exogenous protease treatment without swelling or swelling alone, indicating that the inner membrane and its associating proteins were intact.

### **Legends to figures**

**Figure S1.** Mitofilin is a mitochondrial protein with a predicted transmembrane segment and coiled coil domains. Comparison of the predicted amino acid sequences of mouse

and human mitofilin. (A) Amino acid sequences of mouse and human mitofilin were aligned using Macvector. Identical amino acids are indicated in shaded boxes and similarities as empty boxes. The predicted cleavable presequence (Gavel and von Heijne, 1990) and transmembrane segment (Krogh *et al.*, 2001) is indicated. (B) Coiled coil prediction (Lupas *et al.*, 1991) for the mouse and human mitofilin protein sequences. The window size used was 21.

**Figure S2.** Characterization of anti-mitofilin antibodies. (A) Western blot analysis of mitofilin. C2C12 myoblasts stably expressing mitofilin-Flag and Puro<sup>r</sup> were used to prepare cellular lysate that were size-fractionated by SDS-PAGE and probed with  $\alpha$ -Flag,  $\alpha$ -mitofilin (peptide) and  $\alpha$ -mitofilin (cDNA) antibodies (A). The antibodies were also tested for immunoprecipitation of in vitro transcribed and translated (IVTT) mitofilin-Flag (B). The preimmune sera were used as controls. The immunoprecipitates were size-fractionated by SDS-PAGE, and the gel exposed for autoradiography.

**Figure S3.** Submitochondrial localization of cytochrome c-GFP. Mitochondria isolated from the cytochrome c-GFP expressing HeLa cells were treated with proteinase K or swelled, separated on SDS-PAGE and analyzed by Western blotting with  $\alpha$ -cytochrome c,  $\alpha$ -Hsp60 and  $\alpha$ -mitofilin (cDNA) Abs. The molecular weight markers (kD, Amersham Biosciences) are indicated.

**Figure S4.** Immunolabeling of mitochondria in mouse embryonic heart. (A) Ultrathin section of the 15.5 day old rat embryonic heart mitochondria stained with  $\alpha$ -mitofilin (cDNA), porin (B) and F1 ATPase (C) showing outer rim and internal cristate staining. 5nm gold conjugated secondary antibody. Size bar 250nm. (D) Quantitation of the immunogold particles staining either the rim or cristae following detection with antibody against porin, F1 ATPase and mitofilin. The data is presented as an average of mitochondrial staining counted from 15 independent cells.

**Figure S5.** Quantitation of defective mitochondria in mitofilin siRNA treated cells. (A) A total of 60 (control siRNA), 57 and 50 (mitofilin siRNA) independent cells following 48

hrs of first and second round of siRNA were observed to detect defective mitochondria. Electron microscopic image of an early (B) and late (C) autophagic mitochondria. Images were obtained from cells treated with mitofilin siRNA 48 hrs after two rounds. Size bar 250 nm.

## **References**

- Gavel, Y., and von Heijne, G. (1990). Cleavage-site motifs in mitochondrial targeting peptides. *Protein Eng* 4, 33-37.
- Krogh, A., Larsson, B., von Heijne, G., and Sonnhammer, E.L. (2001). Predicting transmembrane protein topology with a hidden Markov model: application to complete genomes. *J Mol Biol* 305, 567-580.
- Lupas, A., Van Dyke, M., and Stock, J. (1991). Predicting coiled coils from protein sequences. *Science* 252, 1162-1164.
